# Supplementary material for: Complex structural variants in Mendelian disorders: identification and breakpoint resolution using short- and long-read genome sequencing
Source: PubMed Central journal article supplement (PMC6286558; doi:10.1186/s13073-018-0606-6), 2018-12-07
Supplement: 13073_2018_606_MOESM1_ESM.pdf [file 13073_2018_606_MOESM1_ESM.pdf]

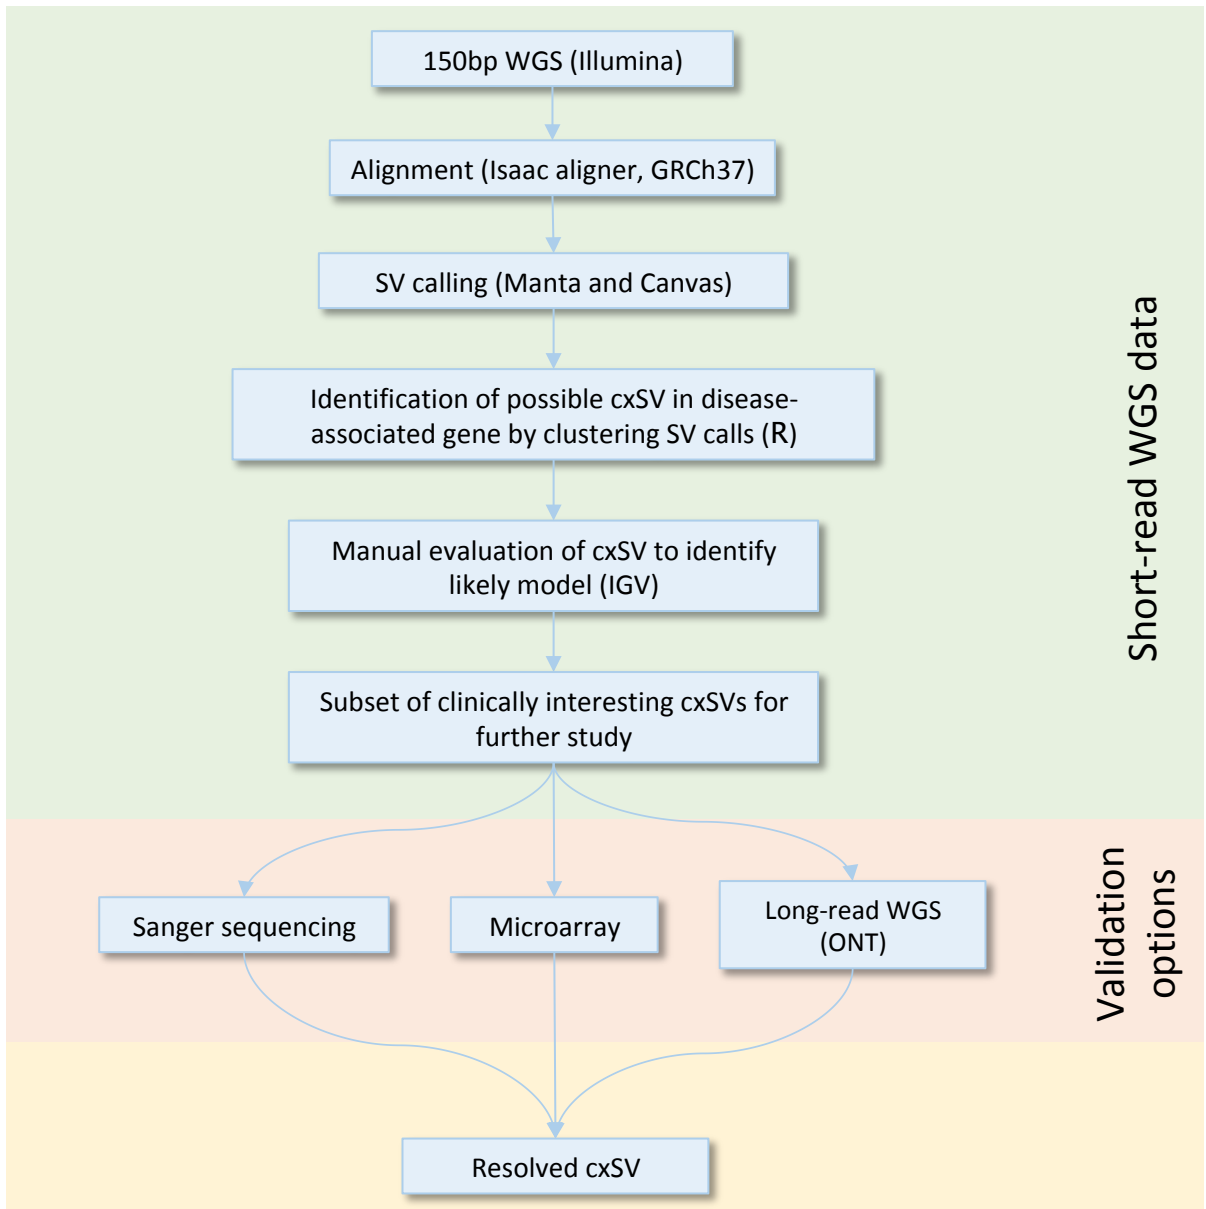

**Figure S1. Complex structural variant analysis workflow.** Schematic describing the general stages of complex structural variant analysis. Each variant was validated by at least two of the validation options. WGS = whole genome sequencing; SV = structural variant; cxSV = complex structural variant; IGV = Integrative Genomics Viewer; ONT = Oxford Nanopore Technologies.

**A**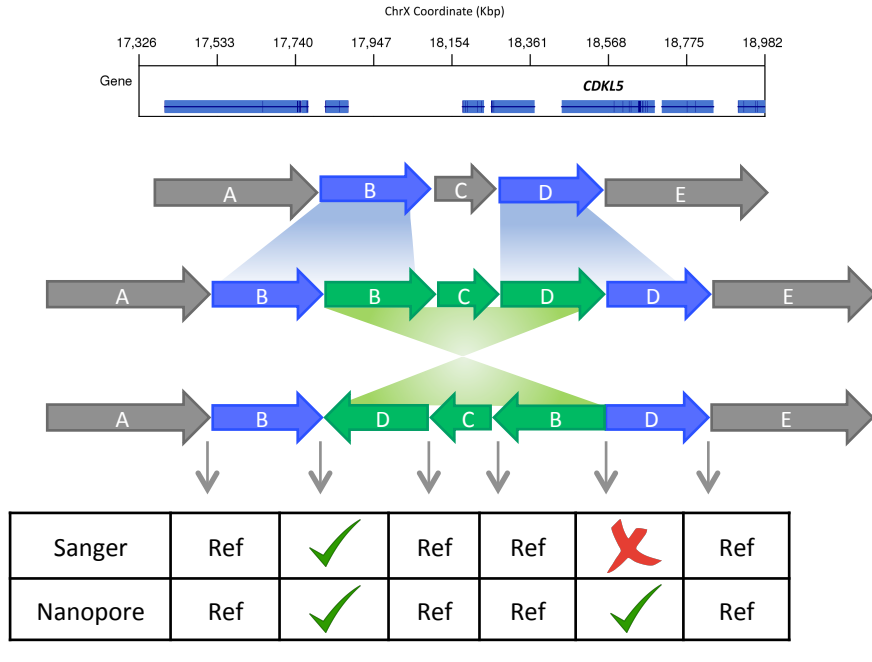**B**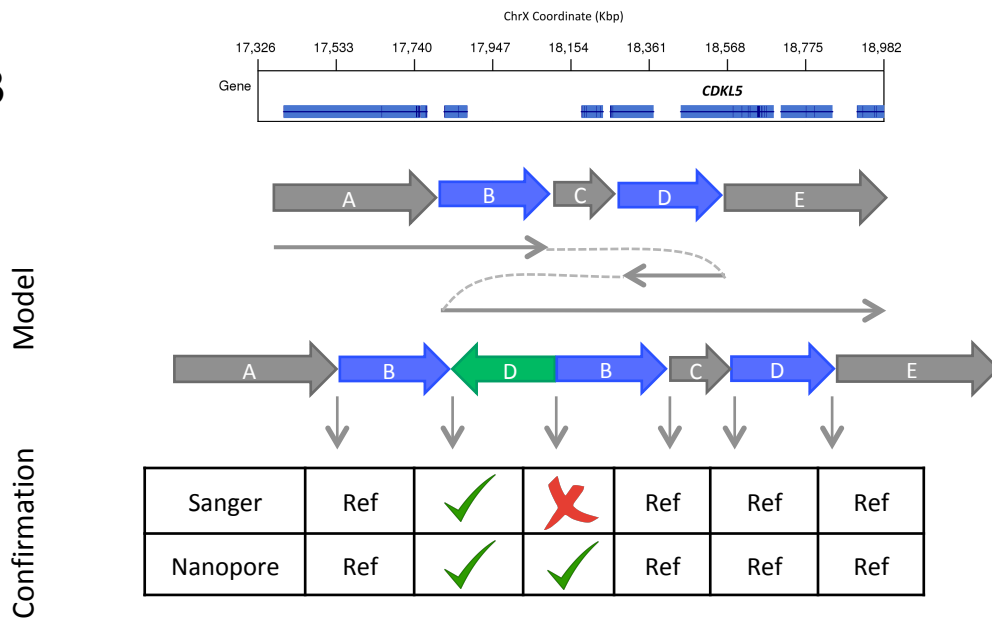

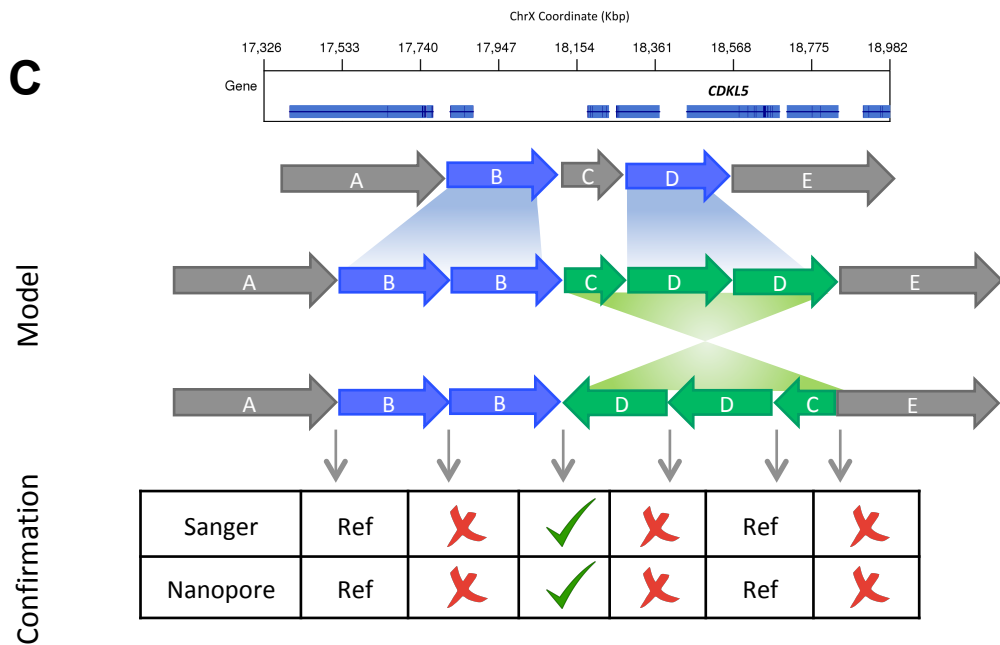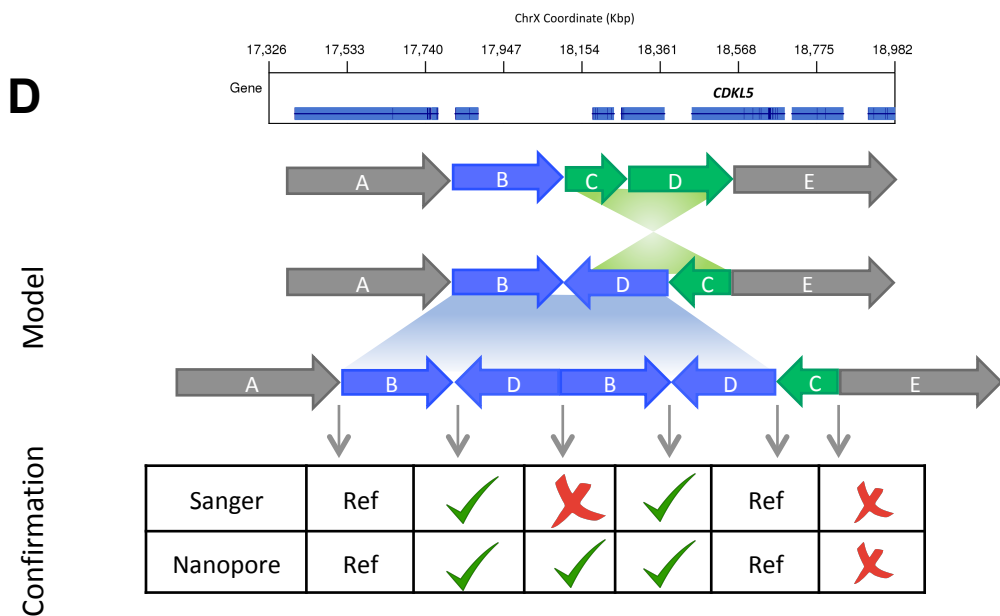

**Figure S2. Complex structural variant models for Participant 4 (P4).** Multiple possible models for the cxSV in P4 were considered, of which four are shown here. **(A)** Formed by two duplications and one inversion. Mechanism suggested by Brand et al. 2015<sup>1</sup>. Resulting junctions of this model were confirmed by Sanger and/or ONT sequencing. **(B)** Mechanism suggested by Gu et al. 2015<sup>2</sup>, formed by one-step event. Resulting junctions of this model were confirmed by Sanger and/or ONT sequencing. **(C)** Rejected model. **(D)** Rejected model. Mechanism suggested by Gu et al. 2015<sup>2</sup>

**A**

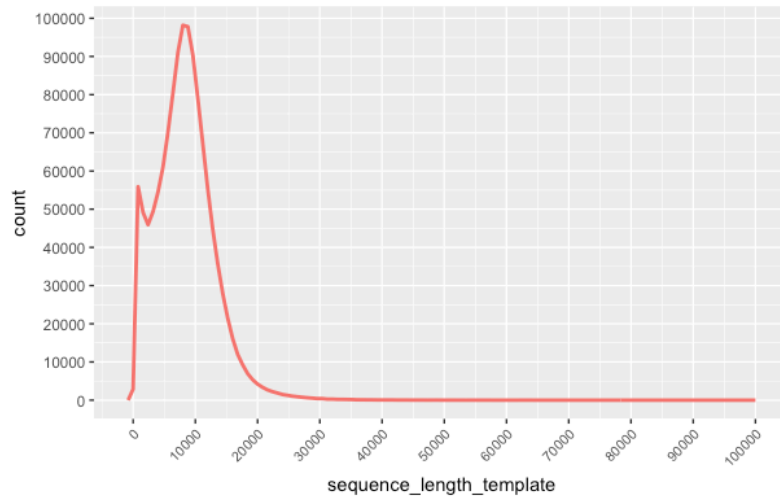

**B**

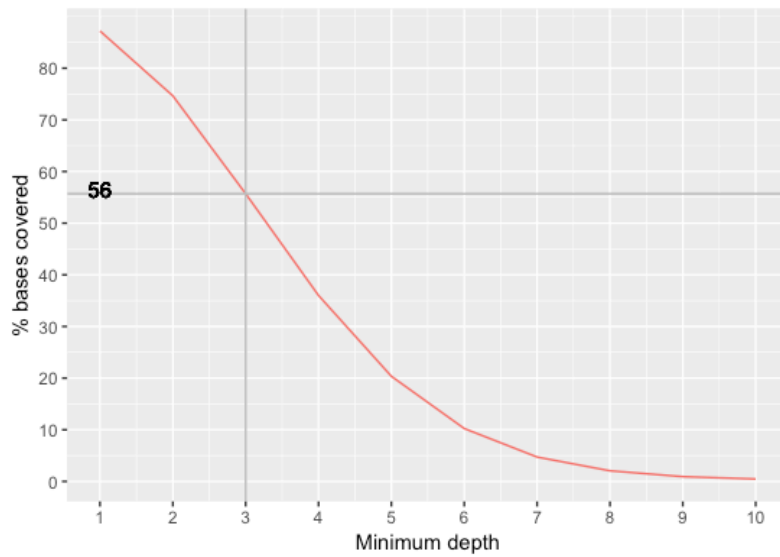

**Figure S3. Quality control results of the long-read sequencing performed on P4. (A) Sequence length template distribution (B) Percentage of bases of the genome covered at a specific minimum coverage.**

**Informative SNP rs35478150  
(GRCh37) Xg.18638082A>C**

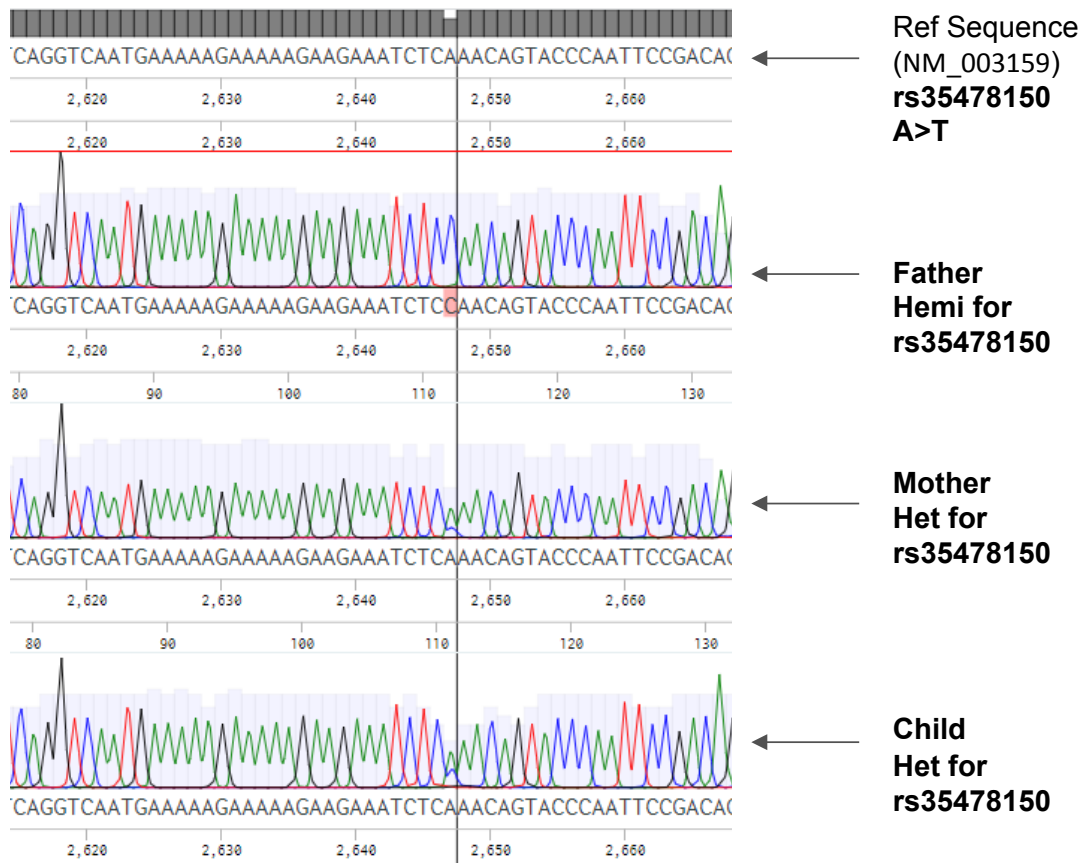

**Figure S4. RNA gene expression of *CDKL5* from P4 and both parents.** PCR amplification and Sanger sequencing of the informative SNP rs35478150 in the cDNA of *CDKL5* demonstrated that P4 expresses both alleles of *CDKL5* in blood cells.

**A**

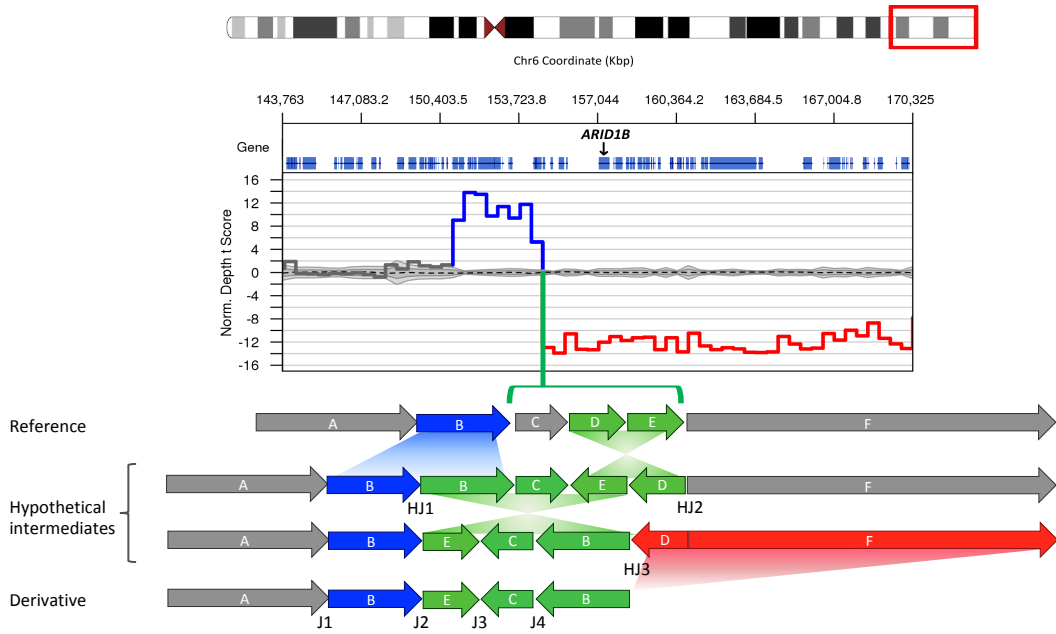

|     |                       |                                                                       |                                                              |
|-----|-----------------------|-----------------------------------------------------------------------|--------------------------------------------------------------|
| HJ1 | 6:151443283-151443342 | <u>GAGAGAGCCAGACAGAAGCTGTATCCTTGTATGACCTAACCTGGAGGTCACCCAGCACT</u>    | LTR/ERVL-MaLR                                                |
|     | HJ1                   | 1-60                                                                  | TATAATCGGTCTCAGGTACCTCTACCCAGAGAGAGGAAGAAAAATTGGGACCCAGCACT  |
|     | 6:154768521-154768580 | TATAATCGGTCTCAGGTACCTCTACCCAGAGAGAGGAAGAAAAATTGGGTACAGATTCT           |                                                              |
|     | 6:151443343-151443382 | <u>GTTTCCACCAAACCTTCACTGACCAAGCTGATCACAAGCCT</u>                      | LTR/ERVL-MaLR                                                |
|     | HJ1                   | 61-100                                                                | GTTTCCACCAAACCTTCACTGACCAAGCTGATCACAAGCCT                    |
|     | 6:154768581-154768620 | AATTC AATCTGGGAAAGTGGTCTGGTCTCATCATATAAT                              |                                                              |
| J2  | HJ1                   | 1-60                                                                  | TATAATCGGTCTCAGGTACCTCTACCCAGAGAGAGGAAGAAAA-ATTGGGACCCAGCACT |
|     | P1                    | 1-60                                                                  | TATAATCGGTCTCAGGTACCTCTACCCAGAGAGAGGAAGAAAA-ATTGGGTCTCTATCA  |
|     | 6:154778852-154778911 | <u>ATAACCTAGAAAAGTGGTGGCCATGCTCACTCCCTTCTTCCTCTTAATTCA-TCCTCTATCA</u> | LINE/L2                                                      |
|     | HJ1                   | 61-100                                                                | GTTTCCACCAAACCTTCACTGACCAAGCTGATCACAAGCCT                    |
|     | P1                    | 61-100                                                                | TTCCATCTGAGCAAAAACCATCCTGTCTTTACAGATCCCA                     |
|     | 6:154778912-154778951 | TTCCATCTGAGCAAAAACCATCCTGTCTTTACAGATCCCA                              |                                                              |
| J3  | 6:154774097-154774040 | <u>CAAAGTTCATAGACTGGGAGGCCGGAACAACAGAAATTTATCTCATCACCC-ATTTTGG</u>    | LTR/ERVL-MaLR                                                |
|     | P1                    | 1-58                                                                  | CAGATCCAGTCCATTAGCTCAACACAGCATCTCAAGTCTTTGGG--ACCCATTPTTGG   |
|     | 6:154778943-154779000 | CAGATCCAGTCCATTAGCTCAACACAGCATCTCAAGTCTTTGGG--ACCCGTCTCTTT            |                                                              |
|     | 6:154774039-154773998 | <u>AGGCTAGAAGTCTGAGATCGAGGTGTCAGCAGGGTAGGTTTC</u>                     | LTR/ERVL-MaLR                                                |
|     | P1                    | 59-100                                                                | AGGCTAGAAGTCTGAGATCGAGGTGTCAGCAGGGTAGGTTTC                   |
|     | 6:154779001-154779042 | CCAAACCTCCCTGCAGTCCCATCATCCTGTAACCTACCCCTAC                           |                                                              |

**B**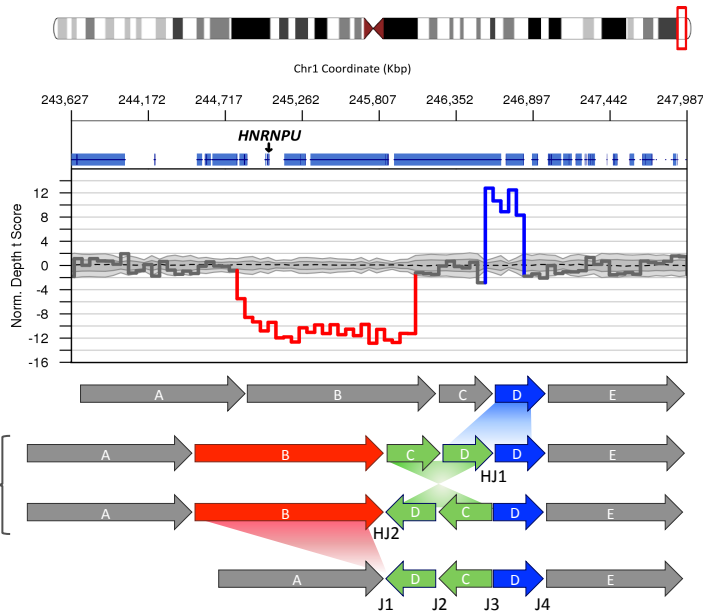

|                       |                                          |                                                                      |                 |
|-----------------------|------------------------------------------|----------------------------------------------------------------------|-----------------|
| HJ1                   | 1:246569822-246569881                    | TAAAAGCTTGCTCCTTGCCTTTTCGCTCTTCTTGTAAAGTCTCTCTTCAGTGCACCGTGTC        |                 |
|                       | HJ1 1-60                                 | CGGGCGTGGTGGCGGGCGCCTGTAGTCCCAGCTACTCGGGAGGCTGAGGCACCGTGTC           |                 |
|                       | 1:246816162-246816221                    | <u>CGGGCGTGGTGGCGGGCGCCTGTAGTCCCAGCTACTCGGGAGGCTGAGGCAGGAGAATGG</u>  | <i>SINE/Alu</i> |
|                       | 1:246569882-246569920                    | CATAGTGCTACGTGTTAGGCACATATTCAAAGCACATGACA                            | <i>SINE/MIR</i> |
| HJ2                   | HJ1 61-100                               | CATAGTGCTACGTGTTAGGCACATATTCAAAGCACATGACA                            |                 |
|                       | 1:246816222-246816261                    | <u>CGTGAACCTGGGAGGCGGAGCTTGCAGTGAGCCGAGATTG</u>                      | <i>SINE/Alu</i> |
|                       | 1:246064189-246064244                    | TCCCAGGGCAGTTTCCCATGATTTCTGTCAATCTTGCCTGTGGCAAAGG---CTAACA           |                 |
|                       | HJ2 1-57                                 | TCCCAGGGCAGTTTCCCATGATTTCTGTCAATCTTGCCTGTGGCAAAGG---GCCTCAG          |                 |
| HJ2                   | HJ1:-1 1-57                              | TGTCAATGTGCTTTGAATAGTGCCCTAACACGTAGCACTA--TGG-ACACGGTGCGCCTCAG       |                 |
|                       | 1:246064245-246064287                    | ATAAAGTAGATTTGAATCTTCAGGAGCTATTAGAATATTCAACT                         |                 |
|                       | HJ2 58-100                               | CCTCCCAGTAGCTGGGACTACAGGCGCCGCCACCACGCCCG                            |                 |
|                       | HJ1:-1 58-100                            | CCTCCCAGTAGCTGGGACTACAGGCGCCGCCACCACGCCCG                            |                 |
| J1                    | HJ2 1-54                                 | TCCCAGGGCAGTTTCCCATGATTTCTGTCAATCTTGCCTGTGGCAAAGG-----GCCT           |                 |
|                       | J1 1-59                                  | GGGGTTTCACCGTGTGAGCCAGGATGGTCTCGATCTCCTGACCTCATGATTCGCC-GCCT         |                 |
|                       | 1:244867151-244867210                    | <u>GGGGTTTCACATGTTAGCCAGGATGGTCTCGATCTCCTGACCTCATGATCTGCCCGCCT</u>   | <i>SINE/Alu</i> |
|                       | HJ2 55-94                                | CAGCCTCCCGAGTAGCTGGGACTACAGGCGCCGCCACCA                              |                 |
| J3                    | J1 60-99                                 | CAGCCTCCCAAAGTGCTGGGATTACAGGCGCCGCCACCA                              |                 |
|                       | 1:244867211-244867250                    | <u>CGGCCTCCCAAAGTGCTGGGAATTACAGGTGTGAGCCACC</u>                      | <i>SINE/Alu</i> |
|                       | HJ1 1-50                                 | CGGGCGTGGTGGCGGGCGCCTGTAGTCCCAGCTACTCGGGAGGCTG--AGGC-----            |                 |
|                       | J3 1-54                                  | AAGTTGAATATTTAATAGCTCCTGAAGATTCATCTACTTTATTGTTAGGGGT-----            |                 |
| J3                    | 1:246064288-246064229                    | AAGTTGAATATTTAATAGCTCCTGAAGATTCATCTACTTTATTGTTAGCCTTTTGCCA           |                 |
|                       | HJ1 51-66                                | -----GCACCGTGTCCATAGT                                                |                 |
|                       | J3 55-114                                | <u>CCCAGAAGAAGGCCCTCCTAGCCGACTACAACAGCAATCTCTAGG</u> CACCGTGTCCATAGT |                 |
|                       | 1:246064228-246064169                    | CAGGCAAGAATGACAGAAATCATGGGAAACTGCCCTGGGATTCCTCCAGACCATGATCT          |                 |
|                       | HJ1 67-106                               | GCTACGTGTTAGGCACATATTCAAAGCACATGACATGTACC                            |                 |
|                       | J3 115-154                               | GCTACGTGTTAGGCACATATTCAAAGCACATGACATGTACC                            |                 |
| 1:246064168-246064129 | GGAAATGTTAGCAAGGTAGCTTCCACCAGCATCCTTGGTT |                                                                      |                 |

C

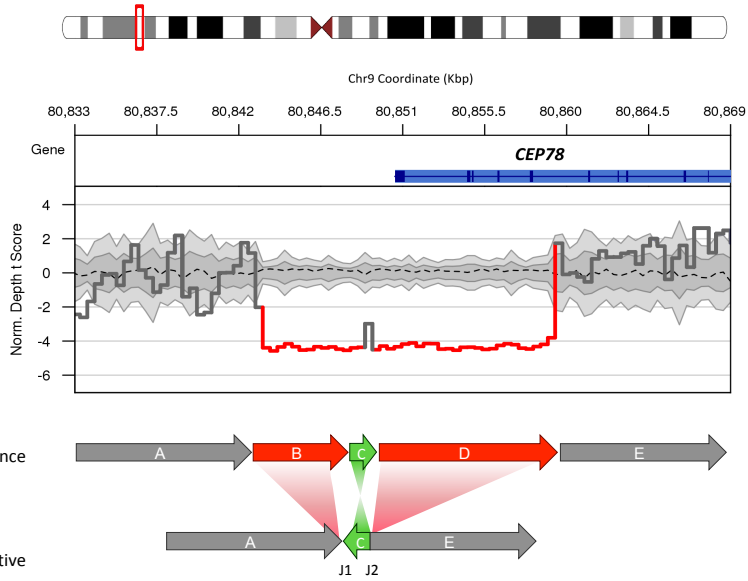

|    |                     |                                                                      |                |
|----|---------------------|----------------------------------------------------------------------|----------------|
| J1 | 9:80843648-80843707 | <u>TGTAATTGTGTTAATAATCTCTAATTGTATTTCTTTAGTTAATAGTTGCCCTAAAGCTTA</u>  | <i>LINE/L1</i> |
|    | J1 1-58             | TGTAATTGTGTTAATAATCTCTAATTGTATTTCTTTAGTTAATAGTTGCC--ATTCCGT          |                |
|    | 9:80849808-80849751 | <u>TAGTAAACGCTTGTATATTCATAAACCCAGCTTAATAAATGAAACAATTACC--ATTCCGT</u> | <i>LINE/L1</i> |
|    | J1 59-98            | TGGAAGACTTTGTGTAACCACCTTCCCAATCAGACTACT                              |                |
|    | 9:80849750-80849711 | <u>TGGAAGACTTTGTGTAACCACCTTCCCAATCAGACTACT</u>                       | <i>LINE/L1</i> |
|    | J2                  |                                                                      |                |
| J2 | 9:80849512-80849453 | <u>GGAGTTCATGTAGAAACATACAGTAATGTGCTGTTTTCTGTTGATGGTAATTTAAT</u>      | <i>LINE/L1</i> |
|    | J2 1-57             | GGAGTTCATGTAGAAACATACAGTAATGTGCTGTTTTCTGTTGATGG---CTTATCC            |                |
|    | 9:80859632-80859688 | <u>TTAGTGACTCTTCAGGTTCCATTATGTTAATATGCAATAGTACACTTGG---CTTATCC</u>   | <i>LINE/L1</i> |
|    | J2 58-97            | GTTCCATTAGATATATAAGCTATTTCAGTTTTTCATTG                               |                |
|    | 9:80859689-80859728 | <u>GTTCCATTAGATATATAAGCTATTTCAGTTTTTCATTG</u>                        | <i>LINE/L1</i> |
|    | J2                  |                                                                      |                |



D

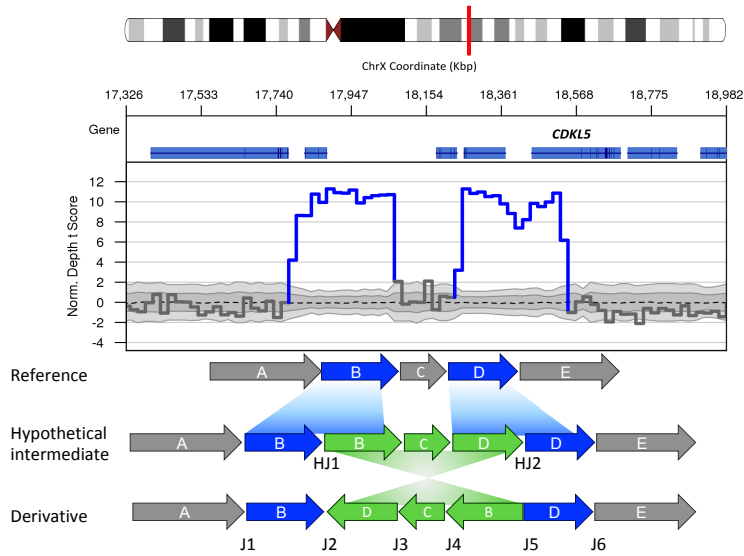

|                     |                                          |                                                                                |                 |
|---------------------|------------------------------------------|--------------------------------------------------------------------------------|-----------------|
| HJ1                 | X:17792960-17793019                      | ACATGATCTGCCTCTGCCCATGCTTACTGTCTTTCTGACATTGTCACCCACACATGATG                    |                 |
|                     | HJ1 1-60                                 | AGAAGACTAACTGAAAAAGTTTGTTTTGTGTCTATATTTGGTGCCAGTTACACATGATG                    |                 |
|                     | X:18073956-18074015                      | AGAAGACTAACTGAAAAAGTTTGTTTTGTGTCTATATTTGGTGCCAGTTTGTGAGAAA                     |                 |
|                     | X:17793020-17793059                      | TGGCTCTGACCATCTCTTCCTGTCTTCTTTCATTGGTAC                                        |                 |
|                     | HJ1 61-100                               | TGGCTCTGACCATCTCTTCCTGTCTTCTTTCATTGGTAC                                        |                 |
| X:18074016-18074055 | ACCCTATCTAACTTGATGTTATTCAAGCATGCCAACAGC  |                                                                                |                 |
| HJ2                 | X:18249005-18248946                      | <u>CATGAGCCACCATGCCAGCCTATGCCTTATTGTATTACACTCAATGCCAACACATGATG</u>             | <i>SINE/Alu</i> |
|                     | HJ2 1-60                                 | CATGAGCCACCATGCCAGCCTATGCCTTATTGTATTACACTCAATGCCACTGGATCAGC                    |                 |
|                     | X:18532362-18532303                      | TGAAATTGAGCAGCATTAATTTTCAGTAAATTAGGAAGTATGATCTTTGGTCTGGATCAGC                  |                 |
|                     | X:18248945-18248906                      | TGGCTCTGACCATCTCTTCCTGTCTTCTTTCATTGGTAC                                        |                 |
|                     | HJ2 61-100                               | CCAACATCATATTCTATGCACAAAAGCAAATAACACCTAT                                       |                 |
| X:18532302-18532263 | CCAACATCATATTCTATGCACAAAAGCAAATAACACCTAT |                                                                                |                 |
| J2                  | HJ1 1-60                                 | AGAAGACTAACTGAAAAAGTTTGTTTT-GTGTCTATATTTGGT <u>TGCCA</u> GTACACATGATG          |                 |
|                     | J2 1-60                                  | AGAAGACTAACTGAAAAAGTTTGTTTT-GTGTCTATATTTGGT <u>TGCCA</u> GT <u>TGCACAATCAC</u> | <i>SINE/Alu</i> |
|                     | HJ2 3-50                                 | GAGCCACCATGCCAGCCTATGCCTTATTGTATTACACTCAA- <u>TGCCA</u> -----                  |                 |
|                     | HJ1 61-120                               | TGGCTCTGACCATCTCTTCCTGTCTTCTTTCATTGGTACTCACAGGATCTGCCCCC                       |                 |
|                     | J2 61-115                                | <u>AG-CTCACTGCAGC-CTTGA--CTTCCAGGCTCAAGTGATGCTCCACCTCAGCCTCC</u>               | <i>SINE/Alu</i> |
|                     | HJ2 50-50                                | -----                                                                          |                 |
|                     | HJ1 121-180                              | CACCCCTTCTCTTCTGTCTTTCTGTGCTCCAT <u>CCT</u> CACACCTCTTCTGTCTCCTGTCG            |                 |
|                     | J2 116-175                               | <u>TGAGTAGCTGGACTATACACATGAACCACCACACCT</u> GGATCAGCCCAACATCATATTCT            | <i>SINE/Alu</i> |
|                     | HJ2 51-75                                | ----- <u>CT</u> GGATCAGCCCAACATCATATTCT                                        |                 |
|                     | HJ1 181-200                              | TGTCTTCTGTTTTAGTAGG                                                            |                 |
| J2 176-175          | ATGCACAAAAGCAAATAACA                     |                                                                                |                 |
| HJ2 76-95           | ATGCACAAAAGCAAATAACA                     |                                                                                |                 |
| J5                  | HJ1 100-40                               | GTACCAATGAAAGGAAGCAGGAAGAGATGGTCAGAGCCACATCAT <u>GTG</u> TAACTGGCACC           |                 |
|                     | J5 1-60                                  | GTACCAATGAAAGGAAGCAGGAAGAGATGGTCAGAGCCACATCAT <u>GTG</u> TGGCATTGAG            |                 |
|                     | HJ2 100-43                               | GGTGATTTTGTCTTTGTGCATAGAATATGATGTTGGGCTGATCCA <u>GTG</u> ---GCATTGAG           |                 |
|                     | HJ1 39-1                                 | AAATATAGACACAAAACAACCTTTTTCAGTTAGTCTTCT                                        |                 |
|                     | J5 61-100                                | TGTAATACAAATAAGGCATAGGCTGGGCATGGTGGCTCATG                                      |                 |
|                     | HJ2 42-3                                 | TGTAATACAAATAAGGCATAGGCTGGGCATGGTGGCTCATG                                      |                 |

**Figure S5. Proposed mechanisms of cxSV formation and breakpoint junction alignments for P1 (A), P2 (B), P3 (C) and P4 (D).** Breakpoint junction sequence is aligned to the proximal and distal genomic reference sequence or sequence of breakpoint junction in hypothetical intermediate, as shown. Alignment is only shown for novel breakpoint junctions in the derivative chromosome, and the precursor hypothetical intermediate, if any. Microhomology at the breakpoint is indicated in red. Sequence in blue indicates inserted sequences at the breakpoint junction. Underline indicates repetitive elements in the reference, specified in *italic*. J=Junction; HJ=Hypothetical junction.

## References

1. Brand H, Collins RL, Hanscom C, Rosenfeld JA, Pillalamarri V, Stone MR et al **Paired-Duplication Signatures Mark Cryptic Inversions and Other Complex Structural Variation.** *Am J Hum Genet* 2015, 97(1)170-176.
2. Gu S, Yuan B, Campbell IM, Beck CR, Carvalho CMB, Nagamani SCS et al **Alu-mediated diverse and complex pathogenic copy-number variants within human chromosome 17 at p13.3.** *Hum Mol Genet.* 2015 Jul 15; 24(14) 4061–4077.
